# Supplementary material
Source: PubMed Central journal article supplement (PMC10548871)
Supplement: ehp11538.smcontents.508.pdf [file ehp11538.smcontents.508.pdf]

**Note to readers with disabilities:** *EHP* strives to ensure that all journal content is accessible to all readers. However, some figures and Supplemental Material published in *EHP* articles may not conform to [508 standards](#) due to the complexity of the information being presented. If you need assistance accessing journal content, please contact [ehp508@niehs.nih.gov](mailto:ehp508@niehs.nih.gov). Our staff will work with you to assess and meet your accessibility needs within 3 working days.

### **Supplemental Material**

#### **Long-Term Exposure to Walkable Residential Neighborhoods and Risk of Obesity-Related Cancer in the New York University Women's Health Study (NYUWHS)**

Sandra India-Aldana, Andrew G. Rundle, James W. Quinn, Tess V. Clendenen, Yelena Afanasyeva, Karen L. Koenig, Mengling Liu, Kathryn M. Neckerman, Lorna E. Thorpe, Anne Zeleniuch-Jacquotte, and Yu Chen

#### **Table of Contents**

**Table S1.** First Incident Obesity-related Cancers in the NYUWHS (n=13,240).

**Table S2.** Linearity Test using Cubic splines for the Association between Neighborhood Walkability and Obesity-related Cancer in the NYUWHS (n=13,240).

**Table S3.** Testing Proportional Hazards (PH) Assumption in the Association between Neighborhood Walkability and Obesity-related Cancer in the NYUWHS (n=13,240).

**Table S4.** NYUWHS Demographic and Lifestyle Characteristics by History of Moving from Baseline Residence, N=13,240.

**Table S5.** Neighborhood Walkability Exposure Availability and Person-Time Years in the NYUWHS.

**Table S6.** Obesity-related Cancer Hazard Ratios based on Neighborhood Walkability Sensitivity Analyses.

**Table S7.** Obesity-related Cancer Hazard Ratios based on Neighborhood Walkability Sensitivity Analyses Using Different Time-Scales (n=13,240).

**Table S8.** Obesity-related Cancer Hazard Ratios based on Median and Continuous (Per IQR) Neighborhood Walkability (n=13,240).

**Table S9.** Stratified Analyses by Age, BMI, and Parity for Additional Frequent Cancer Subtypes (n=13,240).

**Table S10.** Stratified Analyses by Poverty, DASH Diet, and Smoking Status for Additional Frequent Cancer Subtypes (n=13,240).

**Table S11.** Stratified Analyses by Race for Additional Frequent Cancer Subtypes in the NYUWHS (n=11,608).

**Table S12.** Stratified Analyses by Education for Additional Frequent Cancer Subtypes in the NYUWHS (n=10,842).

**Table S13.** Stratified Analyses by Median Outdoor Walking at Baseline and History of Diabetes for Most Frequent Cancer Subtypes in the NYUWHS (n=13,240).

**Table S14.** Postmenopausal Breast Cancer Competing Risk Hazard Ratios based on Neighborhood Walkability by ER/PR Status.

**Figure S1.** Follow-up Questionnaires' Timeline in the NYUWHS.

**Figure S2.** Time-varying Exposure Characterization Scenario for NYUWHS Participant with Long Follow-Up.

## **References**
